# Supplementary material
Source: HighWire-hosted journal article supplement (https://mentalhealth.bmj.com/highwire/filestream/68332/field_highwire_adjunct_files/0/84117table.pdf)
Supplement: 84117table.pdf [file 84117table.pdf]

Factors associated with no drug treatment

| <b>Factor</b>          | <b>Odds ratio (95% CI)</b> |
|------------------------|----------------------------|
| Gender                 |                            |
| Female                 | 1.00                       |
| Male                   | 1.29 (1.13–1.47)           |
| Race                   |                            |
| White, non-Hispanic    | 1.00                       |
| Black, non-Hispanic    | 1.91 (1.62–2.24)           |
| Days in long term care |                            |
| 0                      | 1.00                       |
| 1–119                  | 1.40 (1.22–1.59)           |
| ≥120                   | 1.36 (1.06–1.74)           |
| Age (years)            |                            |
| 65–74                  | 1.00                       |
| 75–84                  | 0.86 (0.76–0.97)           |
